# Supplementary material
Source: PubMed Central journal article supplement (PMC8527568)

Figure S1. B16BL6 cells expressed higher levels of p-c-Kit and c-Kit compared with B16F1 cells. (A) Expression levels of p-c-Kit and c-Kit in B16F1 and B16BL6 cells were detected via western blotting. (B) Semi-quantification of the ratio of p-c-Kit/c-Kit.  $\beta$ -actin was used as internal control. Data are presented as the mean  $\pm$  SD of three independent experiments. \* $P < 0.05$  vs. B16F1. p-, phosphorylated.

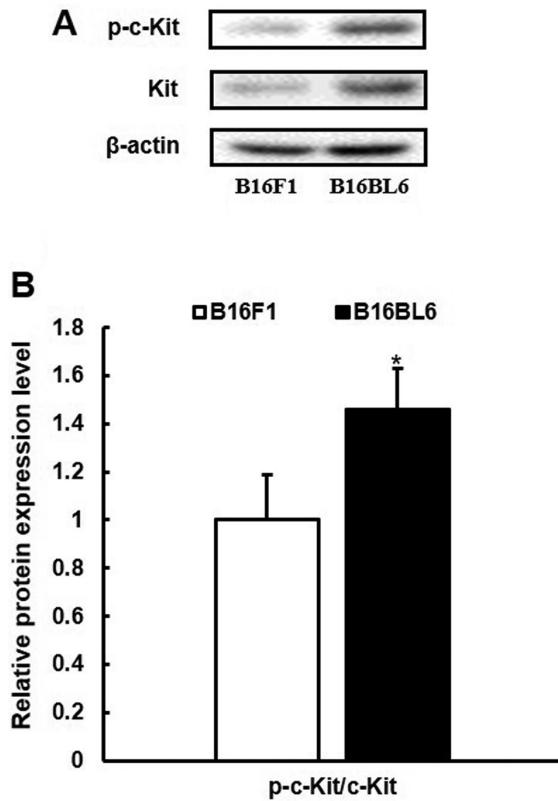

Figure S2. Sorafenib inhibits the viability of B16F1 cells. B16F1 cells were treated with sorafenib (0.1, 0.5, 1, 5, 10, 25 and 50  $\mu\text{M}$ ). After incubation, the cells were stained with trypan blue and the number of stained cells was counted at 1, 3 and 5 days. The results are representative of three independent experiments. \* $P < 0.05$  vs. control.

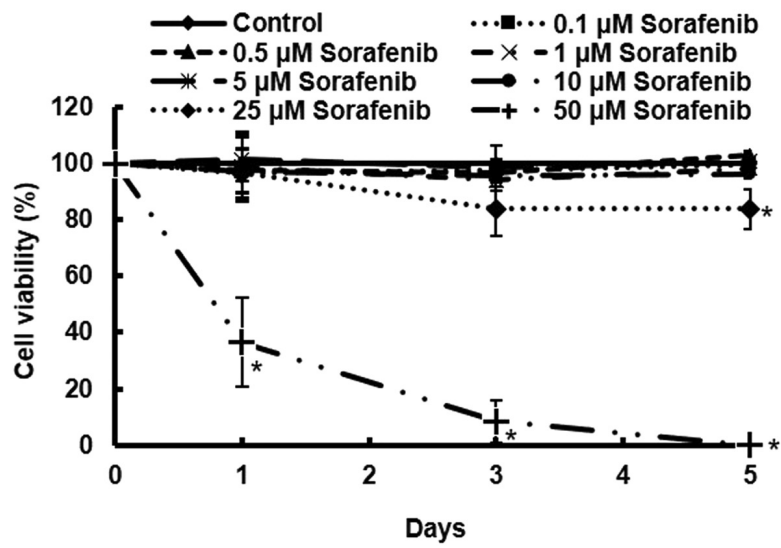

Figure S3. Sorafenib inhibits the migration and invasion of melanoma cells. (A) B16BL6 and MeWo cells were treated with sorafenib (0.5, 1, 5 and 10  $\mu\text{M}$ ), and the migrated cells were measured in Falcon cell culture inserts. Representative images of migration assay of B16BL6 and MEWO cells. Magnification, x20. Scale bar, 50  $\mu\text{m}$ . (B) B16BL6 and MeWo cells were treated with sorafenib (0.5, 1, 5 and 10  $\mu\text{M}$ ), and the migrated cells were measured in Falcon cell culture inserts with Matrigel. Representative images of invasion assay of B16BL6 and MEWO cells. Magnification, x20. Scale bar, 50  $\mu\text{m}$ .

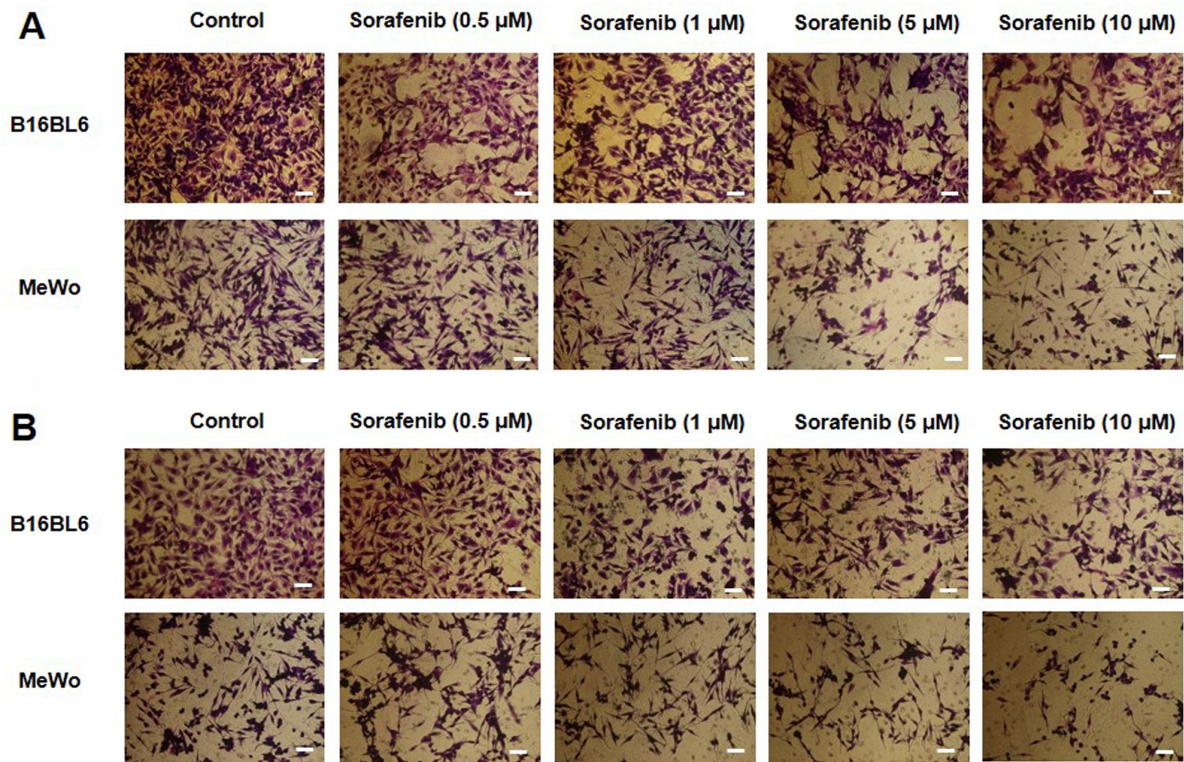

Figure S4. Sorafenib inhibits c-Kit, PDGFR, VEGFR, B-Raf and c-Raf signaling pathways in melanoma cells with c-Kit aberration. B16BL6 cells were treated with sorafenib (0.5, 1, 5 and 10  $\mu$ M), and the protein expression levels of p- and total c-Kit, PDGFR, VEGFR, B-Raf, c-Raf, ERK, Akt, STAT3, NF- $\kappa$ B and p38 were analyzed via western blotting.  $\beta$ -actin was used as internal control. Semi-quantification of the amount of p-c-Kit, p-PDGFR, p-VEGFR, p-B-Raf, p-c-Raf, p-ERK, p-Akt, p-STAT3, p-NF- $\kappa$ B and p-p38, normalized to the amount of c-Kit, PDGFR, VEGFR, B-Raf, c-Raf, ERK, Akt, STAT3, NF- $\kappa$ B and p38. Data are presented as the mean  $\pm$  SD of three independent experiments. \* $P$ <0.05 vs. control. p-, phosphorylated; PDGFR, platelet derived growth factor receptor.

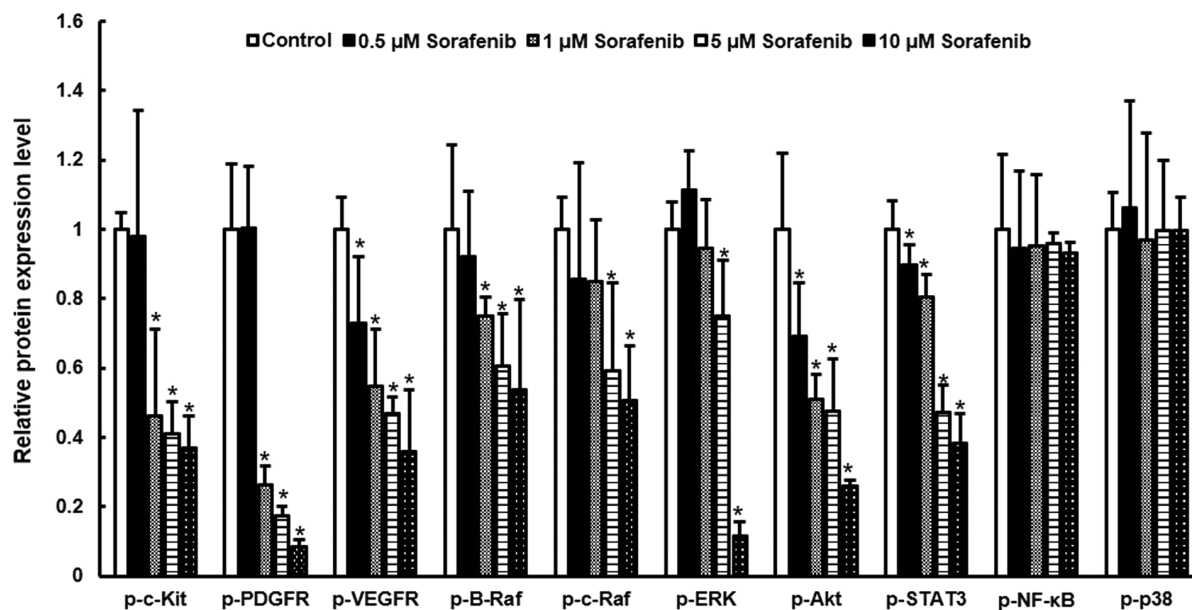

Figure S5. Sorafenib decreases the protein expression levels of MMP-14, VLA-1, VLA-2, VLA-4, VLA-5 and VLA-6 *in vitro*. B16BL6 cells were treated with sorafenib (0.5, 1, 5 and 10  $\mu$ M), and the expression levels of MMP-14, VLA-1, VLA-2, VLA-3, VLA-4, VLA-5 and VLA-6 were analyzed via western blotting.  $\beta$ -actin was used as internal control. Semi-quantification of the amount of (A) MMP-14, (B) VLA-1, VLA-2, VLA-3, VLA-4, VLA-5 and VLA-6, normalized to the amount of  $\beta$ -actin. Data are presented as the mean  $\pm$  SD of three independent experiments. \* $P$ <0.05 vs. control. VLA, very late antigen.

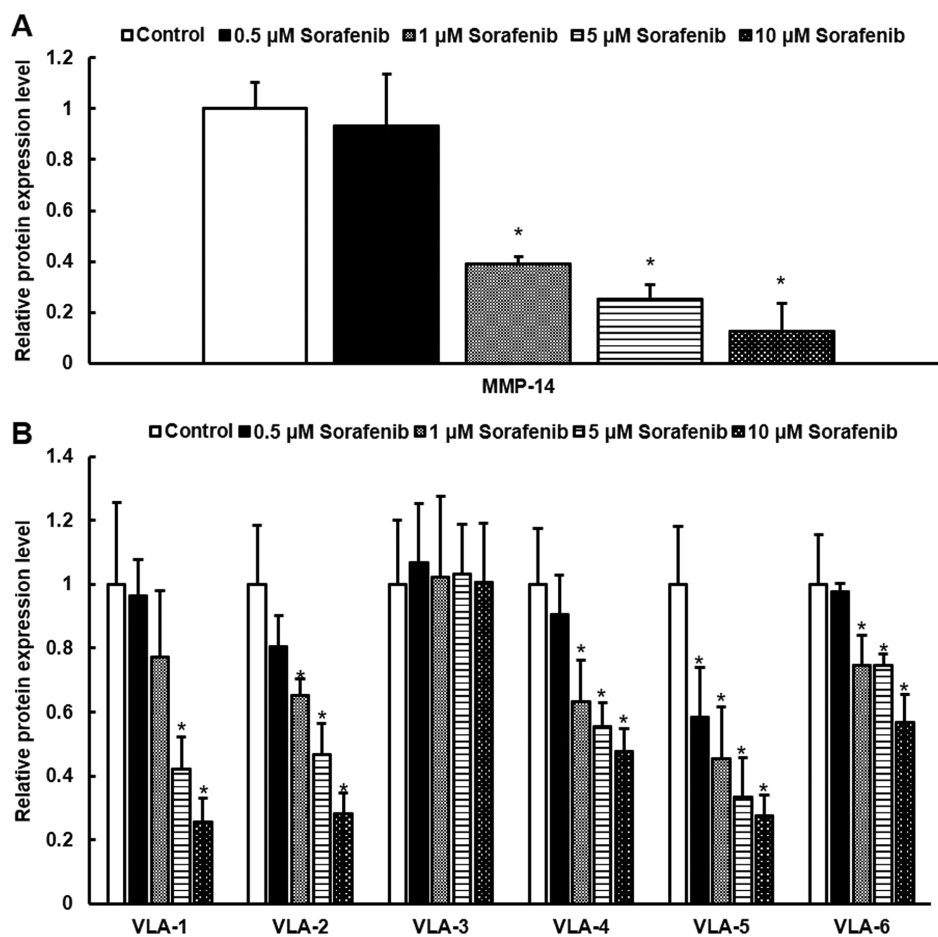

Figure S6. Sorafenib inhibits c-Kit, PDGFR, VEGFR, B-Raf and c-Raf signaling pathways *in vivo*. B16BL6 cells were inoculated into the right hind footpad of mice and treated with sorafenib (10, 30 and 50 mg/kg). After 21 days, the mice were sacrificed, and the right footpads were harvested. The expression levels of p- and total c-Kit, PDGFR, VEGFR, B-Raf and c-Raf were analyzed via western blotting.  $\beta$ -actin were used as internal control. Semi-quantification of the amount of p-c-Kit, p-PDGFR, p-VEGFR, p-B-Raf and p-c-Raf, normalized to the amount of c-Kit, PDGFR, VEGFR, B-Raf and c-Raf. Data are presented as the mean  $\pm$  SD of three independent experiments. \* $P < 0.05$  vs. control. p-, phosphorylated; PDGFR, platelet derived growth factor receptor.

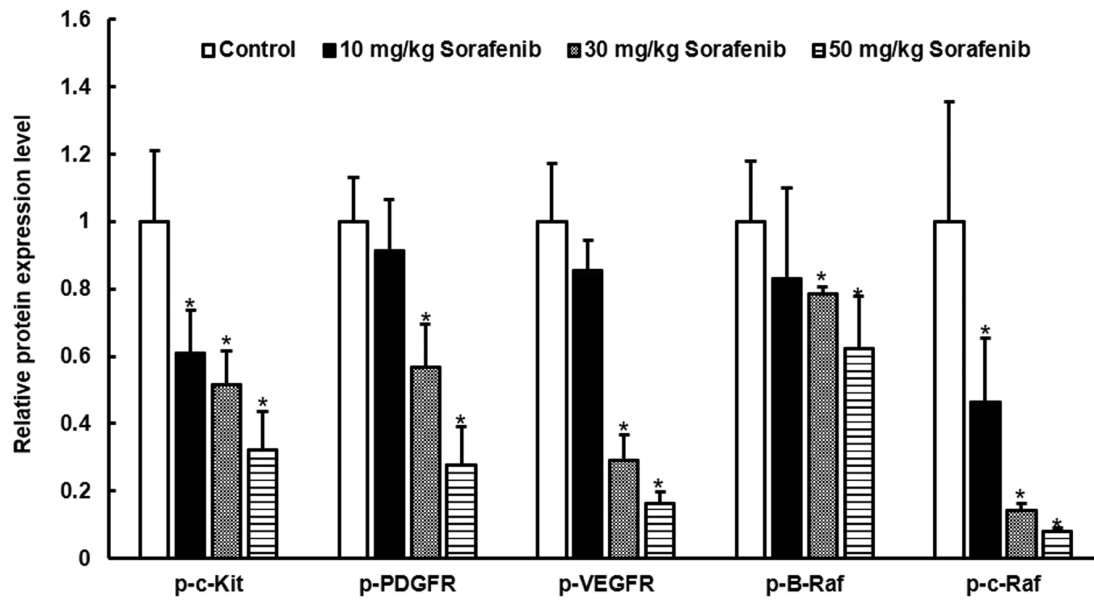

Supplement: Supplementary_Data.pdf [file Supplementary_Data.pdf]
